# Supplementary material for: Myoferlin Contributes to the Metastatic Phenotype of Pancreatic Cancer Cells by Enhancing Their Migratory Capacity through the Control of Oxidative Phosphorylation
Source: PubMed Central journal article supplement (PMC6628295; doi:10.3390/cancers11060853), 2019-06-19
Supplement: cancers-11-00853-s001.pdf [file cancers-11-00853-s001.pdf]

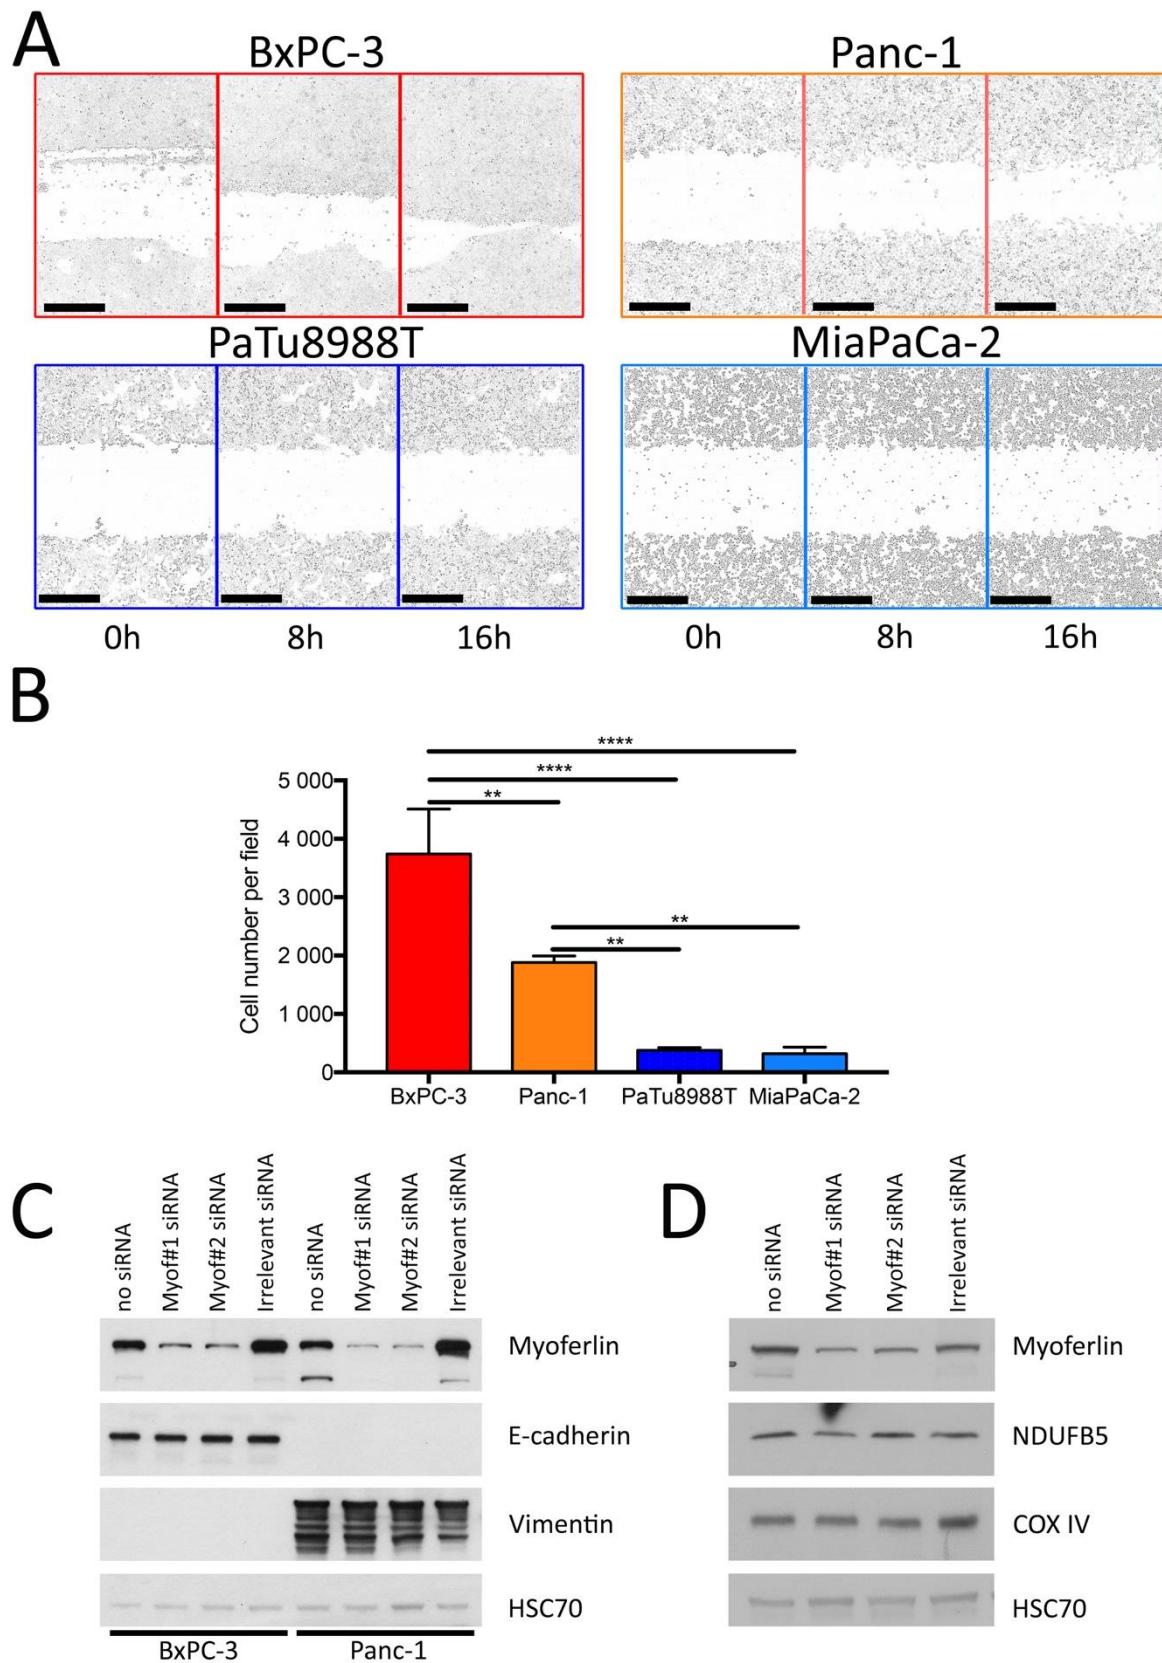

**Figure S1.** Myoferlin abundance correlates with pancreatic cell migratory abilities. (A) Representative images of two-dimension migration kinetic assay in BxPC-3, Panc-1, PaTu8988T and MiaPaCa-2 cell lines. (B) Quantification of migrating PDAC cell lines in the lower compartment of Boyden's chamber. (C) Abundance of E-cadherin and vimentin in BxPC-3 and Panc-1 cells silenced for myoferlin. (D) Abundance of NDUFB5 and COXIV in Panc-1 cells

silenced for myoferlin. One representative experiment out of three is illustrated. Each data point represents mean  $\pm$ SD,  $n = 3$ . \*\*\*\* $P < 0.0001$ , \*\* $P < 0.01$ .

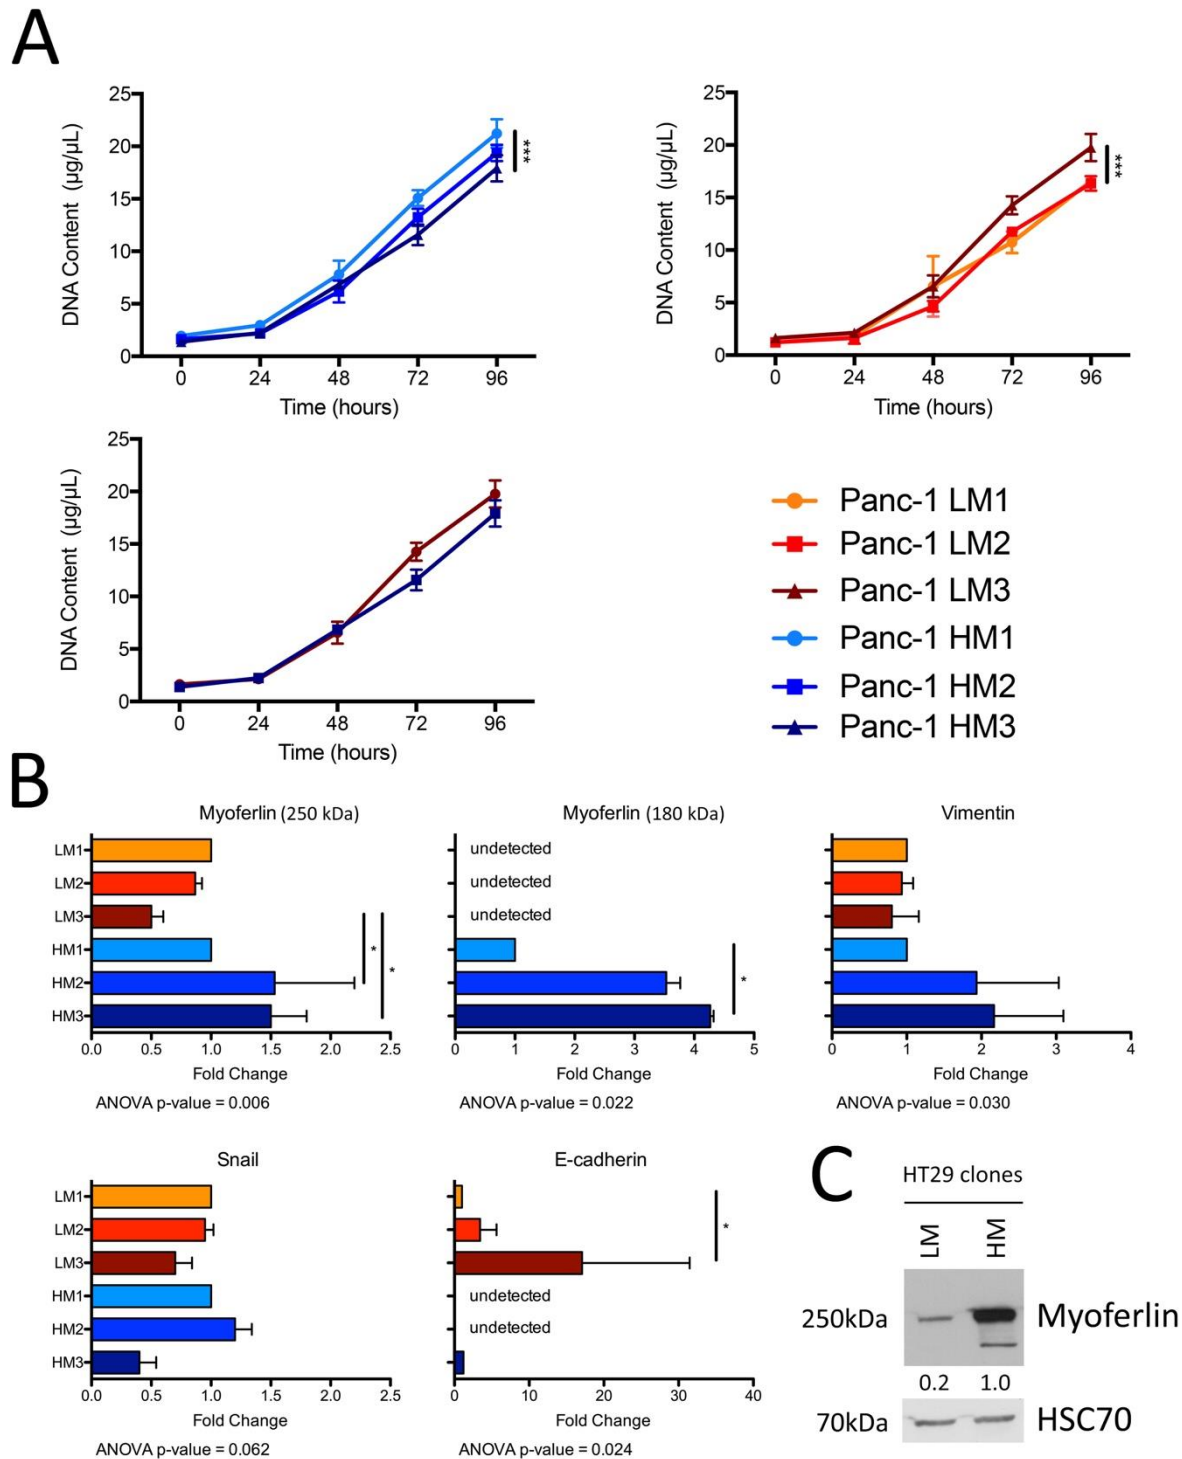

**Figure S2.** Myoferlin is overexpressed in cells with high metastatic potential. (A) Cell growth of Panc-1 clones with low (LM) or high metastatic (HM) potential assayed by Hoechst incorporation. (B) Myoferlin, vimentin, snail and E-cadherin western-blot relative quantification. Comparisons were performed by non-parametric Kruskal-Wallis ANOVA followed by a Dunn's multiple comparison analysis. (C) Myoferlin abundance in HT29 clones with low (LM) or high metastatic (HM) potential. HSC70 was used as an internal loading control. Each data point represents mean  $\pm$ SD,  $n = 3$ . \*\*\*\* $P < 0.001$ , \* $P < 0.05$ .

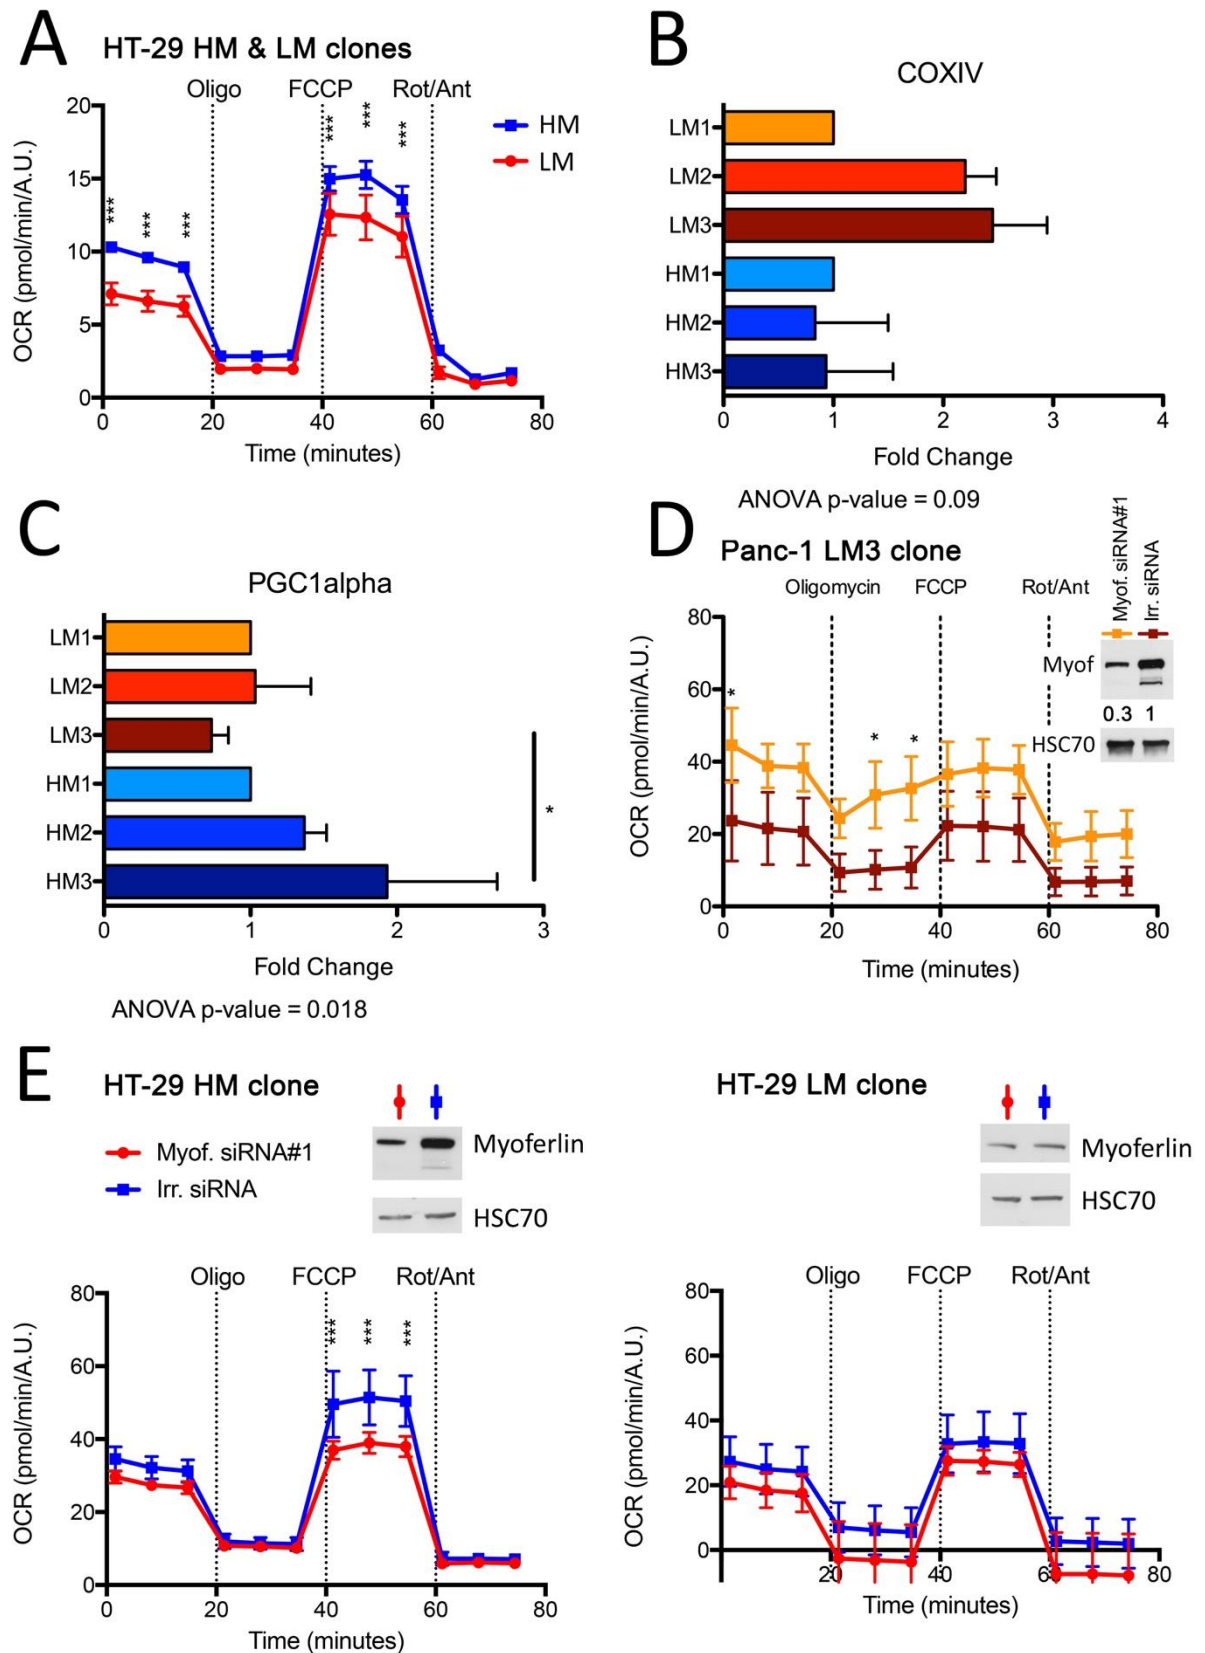

**Figure S3.** Myoferlin increases OXPHOS activity in HM clones. Kinetic oxygen consumption rate (OCR) of (A) HT29 clones (LM & HM), (B–C) COXIV or PGC1- $\alpha$  western-blot relative quantification. Comparisons were performed by non-parametric Kruskal-Wallis ANOVA followed by a Dunn's multiple comparison analysis. (D) Panc-1 LM3 clone silenced for myoferlin. (E) HT29 HM or LM clones silenced for myoferlin. OCR was recorded in

response to oligomycin (oligo, 1  $\mu\text{M}$ ), FCCP (1.0  $\mu\text{M}$ ), rotenone and antimycin A mix (Rot/Ant, 0.5  $\mu\text{M}$  each). Upon assay completion, cells were methanol/acetone fixed, and cell number was evaluated using Hoechst incorporation (arbitrary unit, A.U.). Each data point represents mean  $\pm$ SD, n = 3. \*\*\* $P$  < 0.001, \* $P$  < 0.05.
